# Supplementary material for: Impact of misclassified defective proviruses on HIV reservoir measurements
Source: PubMed Central journal article supplement (PMC10345136; doi:10.1038/s41467-023-39837-z), 2023-07-13
Supplement: 41467_2023_39837_MOESM3_ESM.pdf [file 41467_2023_39837_MOESM3_ESM.pdf]

**File name: Supplementary Data 1**

**Description: Raw data comparison of Q4PCR and IPDA on the same samples, used for analysis and decay modeling.** Measurements where intact HIV DNA was undetectable were set to half of the proviral frequency assuming 1 intact sequence in the number of cells<sup>1</sup> (see blue entries denoted by \*). Samples having DNA quality or probe amplification issue by IPDA were excluded from all modeling analyses but included here for completeness (see red entries denoted by #).
